# Supplementary material for: Impacts of food availability and p CO 2 on planulation, juvenile survival, and calcification of the azooxanthellate scleractinian coral Balanophyllia elegans
Source: Copernicus journal article supplement (doi:10.5194/bg-10-7599-2013), 2013-11-22
Supplement: Supplementary file 1 [file bg-10-7599-2013-supplement.zip]

Table 1S: Total numbers of planula larvae released over 3 months by 10 adults in each treatment (combining jars within treatments).

| Feeding<br>Interval | pCO <sub>2</sub> (μatm) |     |      | Total |
|---------------------|-------------------------|-----|------|-------|
|                     | 410                     | 770 | 1220 |       |
| 3 d                 | 22                      | 21  | 28   | 71    |
| 21 d                | 15                      | 8   | 9    | 32    |
| Total               | 37                      | 29  | 37   | 103   |

  

| 2-way Additive ANOVA, no nesting |    |        |        |        |       |    |
|----------------------------------|----|--------|--------|--------|-------|----|
| Source                           | Df | SS     | MS     | F      | P     |    |
| pCO <sub>2</sub>                 | 2  | 21.33  | 10.67  | 0.593  | 0.628 | ns |
| Food                             | 1  | 253.50 | 253.50 | 14.083 | 0.064 | ns |
| Residuals                        | 2  | 36.00  | 18.00  |        |       |    |

Table 2S: Proportions of juvenile corals dying over 8 months in each treatment (combining jars within treatments). Initial numbers of juveniles are shown in parentheses.

| Feeding<br>Interval | pCO <sub>2</sub> (µatm) |            |            |
|---------------------|-------------------------|------------|------------|
|                     | 410                     | 770        | 1220       |
| 3 d                 | 0.038 (26)              | 0.038 (26) | 0.148 (27) |
| 21 d                | 0.081 (37)              | 0.159 (44) | 0.285 (42) |

| Additive logistic regression model |          |        |        |           |     |
|------------------------------------|----------|--------|--------|-----------|-----|
|                                    | Estimate | S.E    | Z      | P         |     |
| (Intercept)                        | -3.3790  | 0.6459 | -5.231 | < < 0.001 | *** |
| CO <sub>2</sub> 750                | 0.6164   | 0.6431 | 0.958  | 0.338     | ns  |
| CO <sub>2</sub> 1200               | 1.5069   | 0.5955 | 2.531  | 0.011     | *   |
| Food Low                           | 1.0021   | 0.4944 | 2.027  | 0.043     | *   |

Table 3S: Mean volumes ( $\text{mm}^3$ )  $\pm$  s.e.m. of juvenile skeletons after 8 months growth. Numbers of individuals are shown in parentheses.

| Feeding Interval | pCO <sub>2</sub> ( $\mu\text{atm}$ ) |                       |                     |  |  |  |
|------------------|--------------------------------------|-----------------------|---------------------|--|--|--|
|                  | 410                                  | 770                   | 1220                |  |  |  |
| 3 d              | 65.7 $\pm$ 9.8 (23)                  | 101.2 $\pm$ 11.1 (23) | 82.0 $\pm$ 8.8 (22) |  |  |  |
| 21 d             | 10.8 $\pm$ 1.5 (33)                  | 8.7 $\pm$ 0.9 (36)    | 9.6 $\pm$ 1.1 (30)  |  |  |  |

  

| Nested ANOVA (log transformed data) |     |        |        |         |           |     |
|-------------------------------------|-----|--------|--------|---------|-----------|-----|
| Source                              | Df  | SS     | MS     | F       | P         |     |
| pCO <sub>2</sub>                    | 2   | 1.06   | 0.53   | 1.202   | 0.303     | ns  |
| Food                                | 1   | 184.40 | 184.40 | 419.966 | < < 0.001 | *** |
| pCO <sub>2</sub> X Food             | 2   | 2.98   | 1.49   | 3.390   | 0.036     | *   |
| pCO <sub>2</sub> X Food X Jar       | 6   | 0.91   | 0.15   | 0.347   | 0.911     | ns  |
| Residuals (Coral)                   | 156 | 68.50  | 0.44   |         |           |     |

Table 4S: Mean weights (mg)  $\pm$  s.e.m. of juvenile skeletons after 8 months growth. Numbers of individuals are shown in parentheses.

| Feeding Interval | pCO <sub>2</sub> (µatm) |                     |                     |  |  |  |
|------------------|-------------------------|---------------------|---------------------|--|--|--|
|                  | 410                     | 770                 | 1220                |  |  |  |
| 3 d              | 53.7 $\pm$ 5.9 (18)     | 37.0 $\pm$ 3.2 (23) | 41.8 $\pm$ 3.8 (22) |  |  |  |
| 21 d             | 11.2 $\pm$ 1.1 (22)     | 5.8 $\pm$ 0.4 (28)  | 6.9 $\pm$ 0.6 (24)  |  |  |  |

  

| Nested ANOVA (log transformed data) |     |        |        |         |           |     |
|-------------------------------------|-----|--------|--------|---------|-----------|-----|
| Source                              | Df  | SS     | MS     | F       | P         |     |
| pCO <sub>2</sub>                    | 2   | 5.45   | 2.73   | 16.031  | < < 0.001 | *** |
| Food                                | 1   | 104.59 | 104.59 | 614.761 | < < 0.001 | *** |
| pCO <sub>2</sub> X Food             | 2   | 0.35   | 0.17   | 1.023   | 0.363     | ns  |
| pCO <sub>2</sub> X Food X Jar       | 6   | 0.30   | 0.05   | 0.293   | 0.939     | ns  |
| Residuals (Coral)                   | 125 | 21.27  | 0.17   |         |           |     |

Table 5S: Mean densities ( $\text{mg mm}^{-3}$ )  $\pm$  s.e.m. of juvenile skeletons after 8 months growth. Numbers of individuals are shown in parentheses.

| Feeding Interval | pCO <sub>2</sub> ( $\mu\text{atm}$ ) |                      |                      |  |  |  |
|------------------|--------------------------------------|----------------------|----------------------|--|--|--|
|                  | 410                                  | 770                  | 1220                 |  |  |  |
| 3                | 0.79 $\pm$ 0.06 (18)                 | 0.44 $\pm$ 0.04 (23) | 0.54 $\pm$ 0.05 (22) |  |  |  |
| 21               | 1.02 $\pm$ 0.04 (22)                 | 0.68 $\pm$ 0.02 (28) | 0.73 $\pm$ 0.03 (24) |  |  |  |

  

| Nested ANOVA (log transformed data) |     |           |           |        |           |     |
|-------------------------------------|-----|-----------|-----------|--------|-----------|-----|
| Source                              | Df  | SS        | MS        | F      | P         |     |
| pCO <sub>2</sub>                    | 1   | 1.357e-06 | 1.357e-06 | 36.637 | < < 0.001 | *** |
| Food                                | 1   | 1.534e-06 | 1.535e-06 | 41.441 | < < 0.001 | *** |
| pCO <sub>2</sub> X Food             | 1   | 1.800e-08 | 1.810e-08 | 0.488  | 0.486     | ns  |
| pCO <sub>2</sub> X Food X Jar       | 8   | 1.697e-06 | 2.122e-07 | 5.730  | < < 0.001 | *** |
| Residuals (Coral)                   | 123 | 4.554e-06 | 3.700e-08 |        |           |     |

Table 6S: Mean lengths ( $\mu\text{m}$ )  $\pm$  s.e.m. of aragonite crystals in septa of juvenile skeletons after 8 months growth. Numbers of measurements are shown in parentheses.

| Feeding Interval | pCO <sub>2</sub> ( $\mu\text{atm}$ ) |                     |
|------------------|--------------------------------------|---------------------|
|                  | 410                                  | 1220                |
| 3                | 3.0 $\pm$ 0.07 (33)                  | 2.6 $\pm$ 0.05 (44) |
| 21               | 3.0 $\pm$ 0.05 (29)                  | 2.2 $\pm$ 0.04 (42) |

  

| Nested ANOVA                  |     |        |        |         |         |     |
|-------------------------------|-----|--------|--------|---------|---------|-----|
| Source                        | Df  | SS     | MS     | F       | P       |     |
| pCO <sub>2</sub>              | 1   | 15.037 | 15.037 | 153.328 | < 0.001 | *** |
| Food                          | 1   | 1.266  | 1.266  | 12.913  | < 0.001 | *** |
| pCO <sub>2</sub> X Food       | 1   | 1.073  | 1.073  | 10.939  | 0.001   | **  |
| pCO <sub>2</sub> X Food X Jar | 14  | 2.901  | 0.207  | 2.112   | 0.015   |     |
| Residuals (Coral)             | 130 | 12.750 | 0.098  |         |         |     |

Table 7S: Mean widths ( $\mu\text{m}$ )  $\pm$  s.e.m. of aragonite crystals in septa of juvenile skeletons after 8 months growth. Numbers of measurements are shown in parentheses.

| Feeding Interval | pCO <sub>2</sub> ( $\mu\text{atm}$ ) |                       |
|------------------|--------------------------------------|-----------------------|
|                  | 410                                  | 1220                  |
| 3                | 0.13 $\pm$ 0.006 (24)                | 0.14 $\pm$ 0.006 (27) |
| 21               | 0.14 $\pm$ 0.005 (32)                | 0.13 $\pm$ 0.004 (32) |

  

| Nested ANOVA                  |    |         |           |       |       |    |
|-------------------------------|----|---------|-----------|-------|-------|----|
| Source                        | Df | SS      | MS        | F     | P     |    |
| pCO <sub>2</sub>              | 1  | 0.00001 | 0.0000063 | 0.009 | 0.924 | ns |
| Food                          | 1  | 0.00050 | 0.0005029 | 0.729 | 0.395 | ns |
| pCO <sub>2</sub> X Food       | 1  | 0.00228 | 0.0022789 | 3.303 | 0.072 | ns |
| pCO <sub>2</sub> X Food X Jar | 16 | 0.01757 | 0.0010980 | 1.591 | 0.086 | ns |
| Residuals (Coral)             | 95 | 0.06556 | 0.0006901 |       |       |    |
